# Supplementary material
Source: PubMed Central journal article supplement (PMC10615744)
Supplement: 41380_2023_2062_MOESM2_ESM.pdf [file 41380_2023_2062_MOESM2_ESM.pdf]

Arm ■ Delayed ■ Immediate

**A: Baseline**

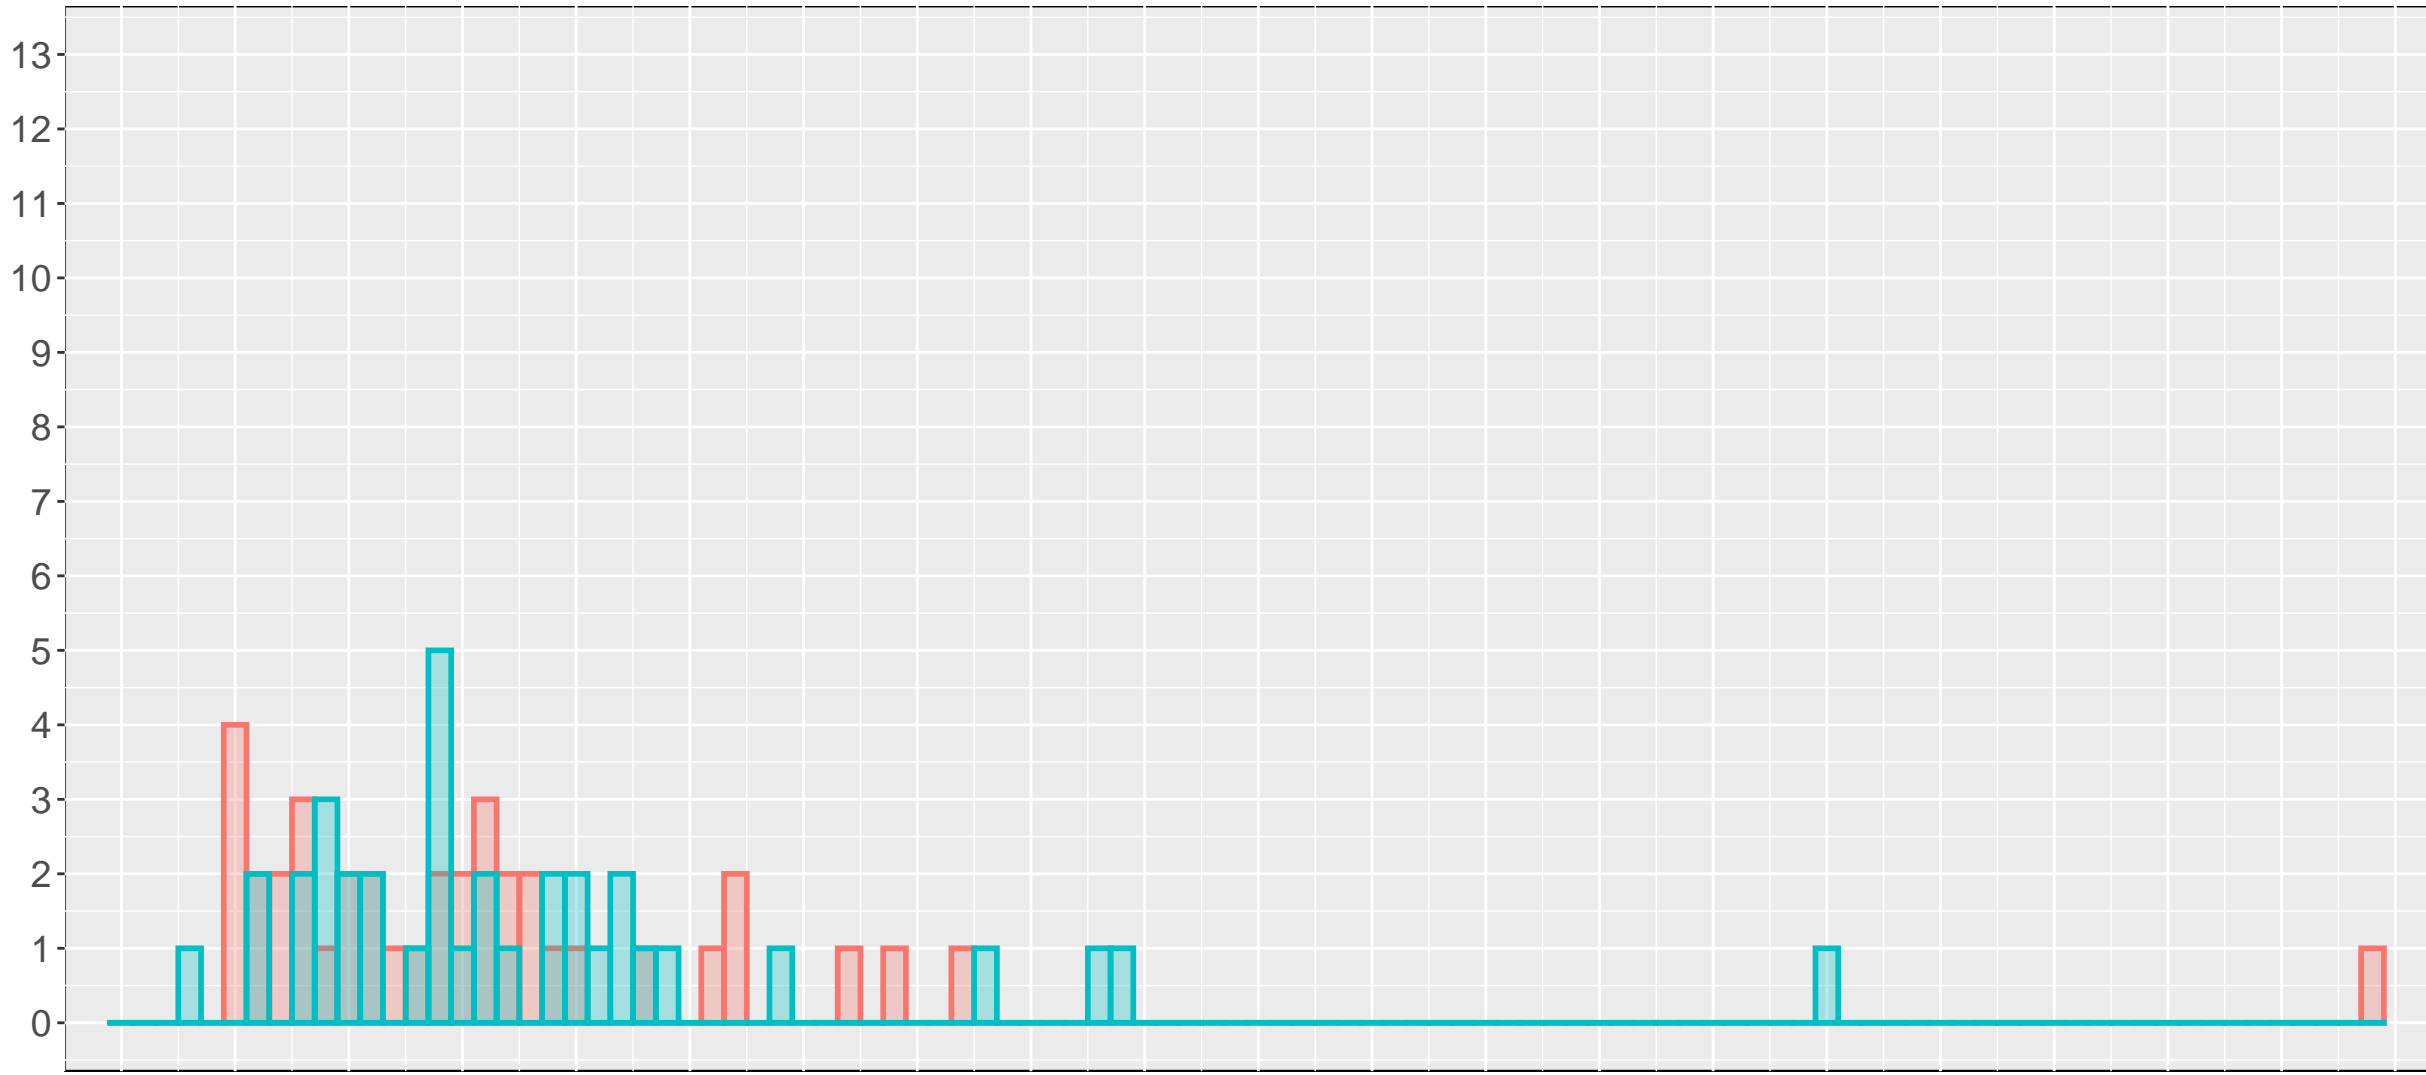

**B: Week 4**

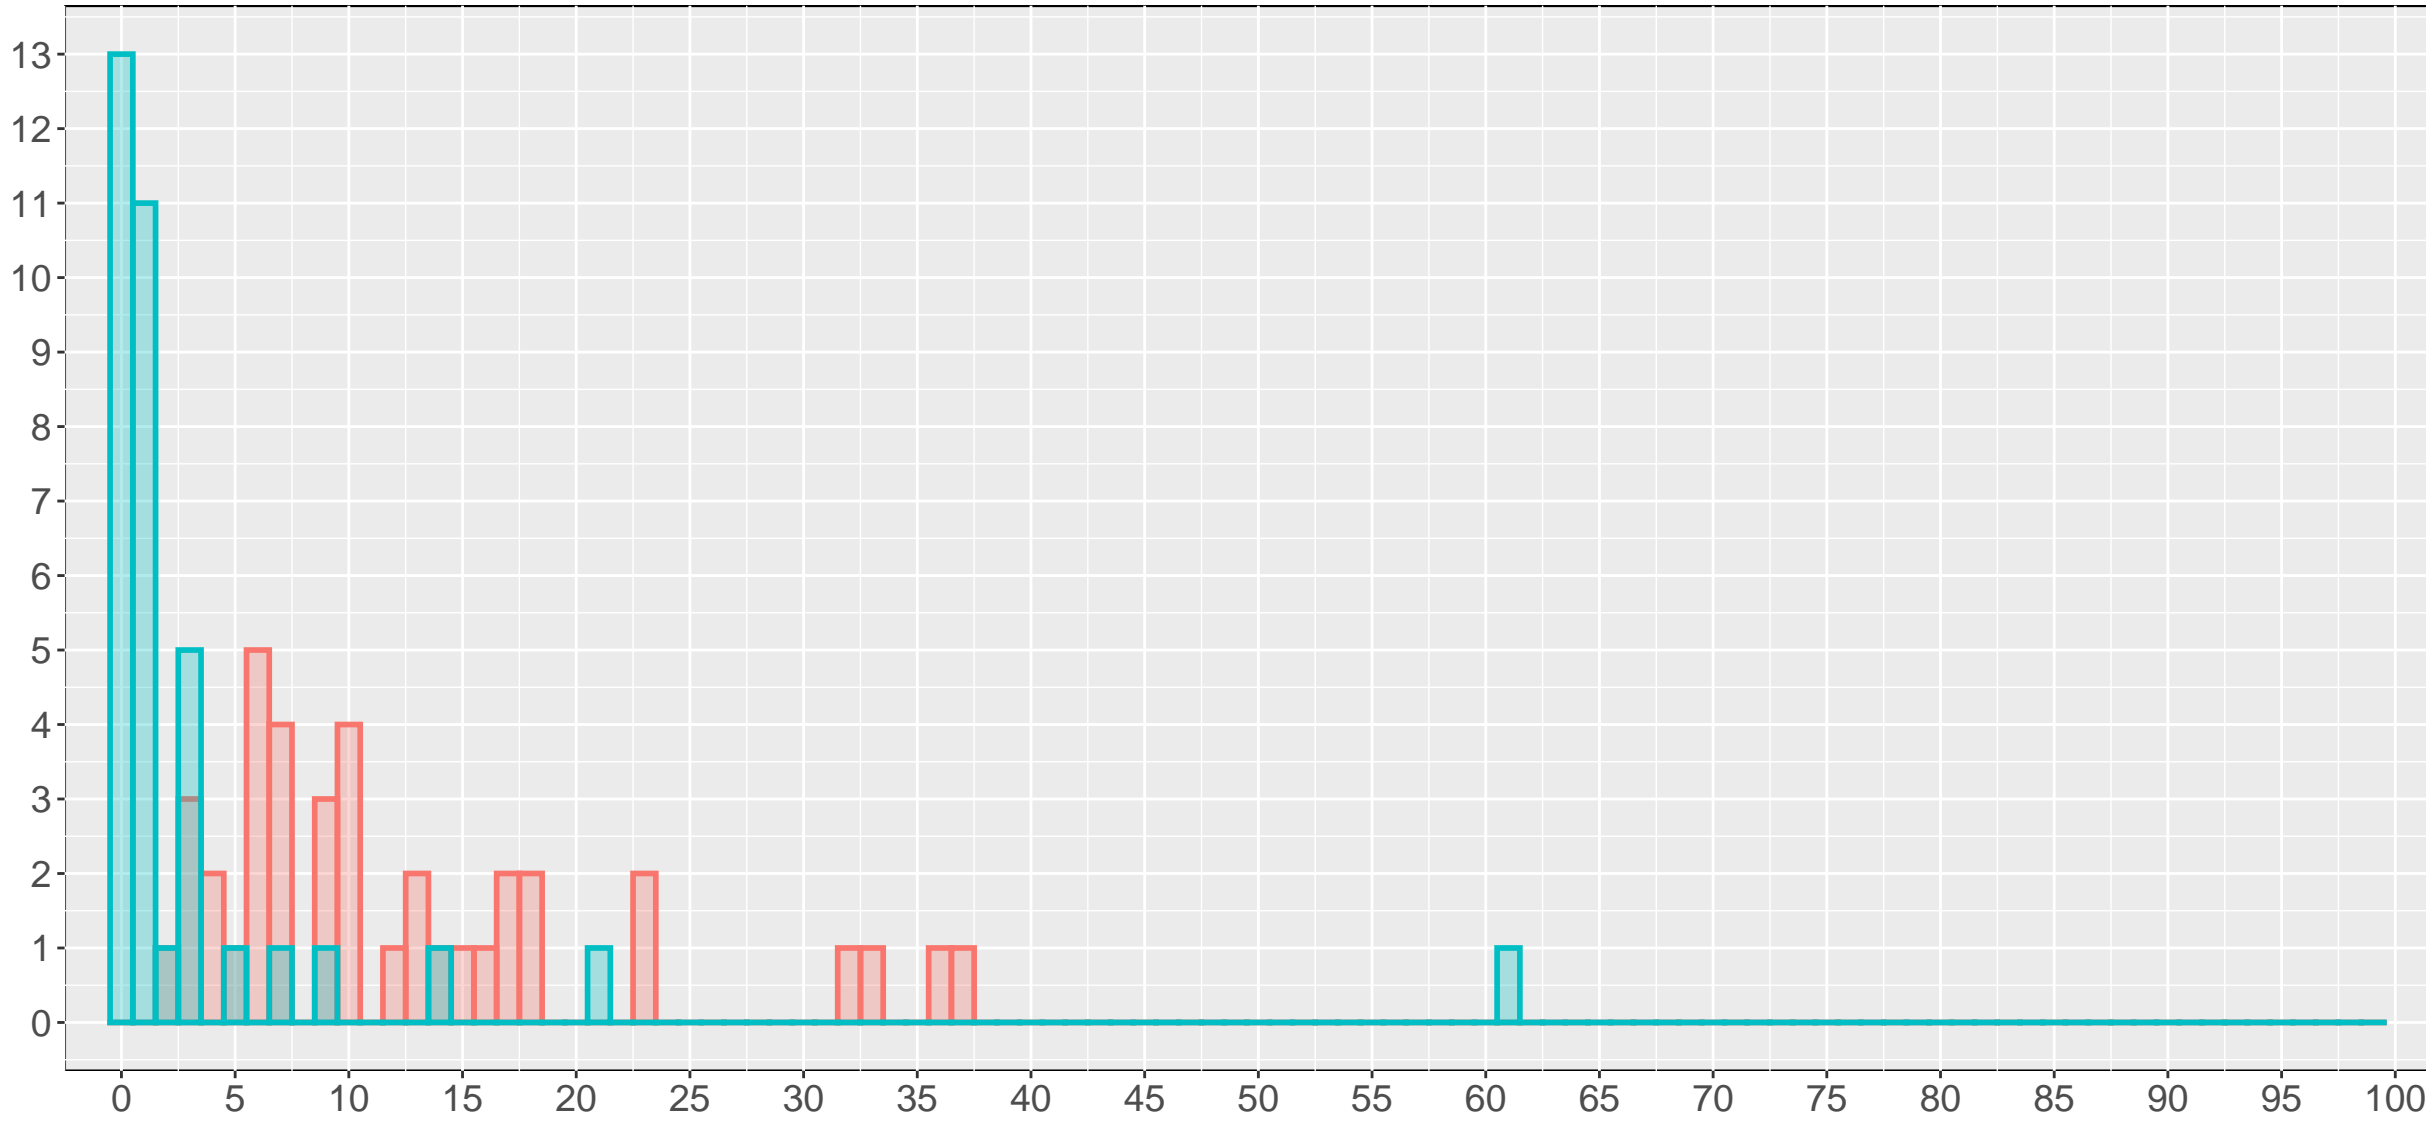

Number of Intrusive Memories in diary for 7 days
