# Supplementary material
Source: PubMed Central journal article supplement (PMC10615744)
Supplement: 41380_2023_2062_MOESM3_ESM.pdf [file 41380_2023_2062_MOESM3_ESM.pdf]

b\_Intercept

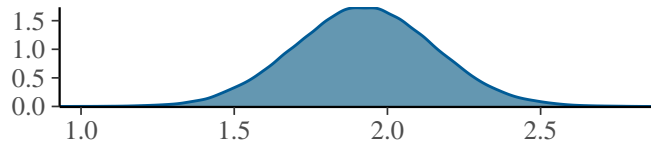

b\_Intercept

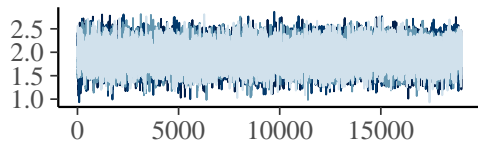

b\_ARMImmediate

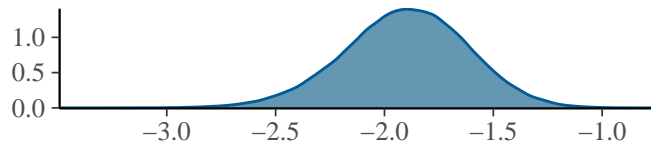

b\_ARMImmediate

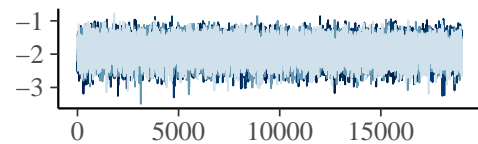

b\_Baseline\_total

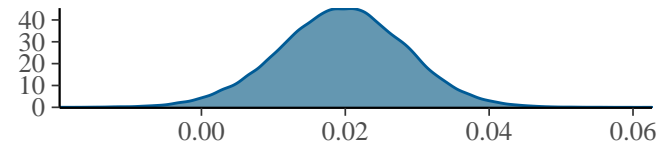

b\_Baseline\_total

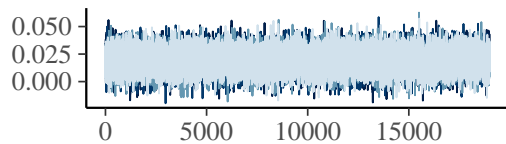

sd\_Subject\_ID\_\_Intercept

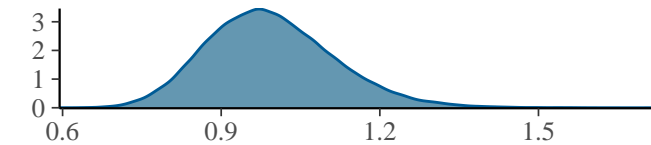

sd\_Subject\_ID\_\_Intercept

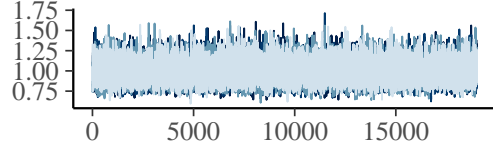

Chain

— 1

— 2

— 3

— 4
