# Supplementary material
Source: PubMed Central journal article supplement (PMC10615744)

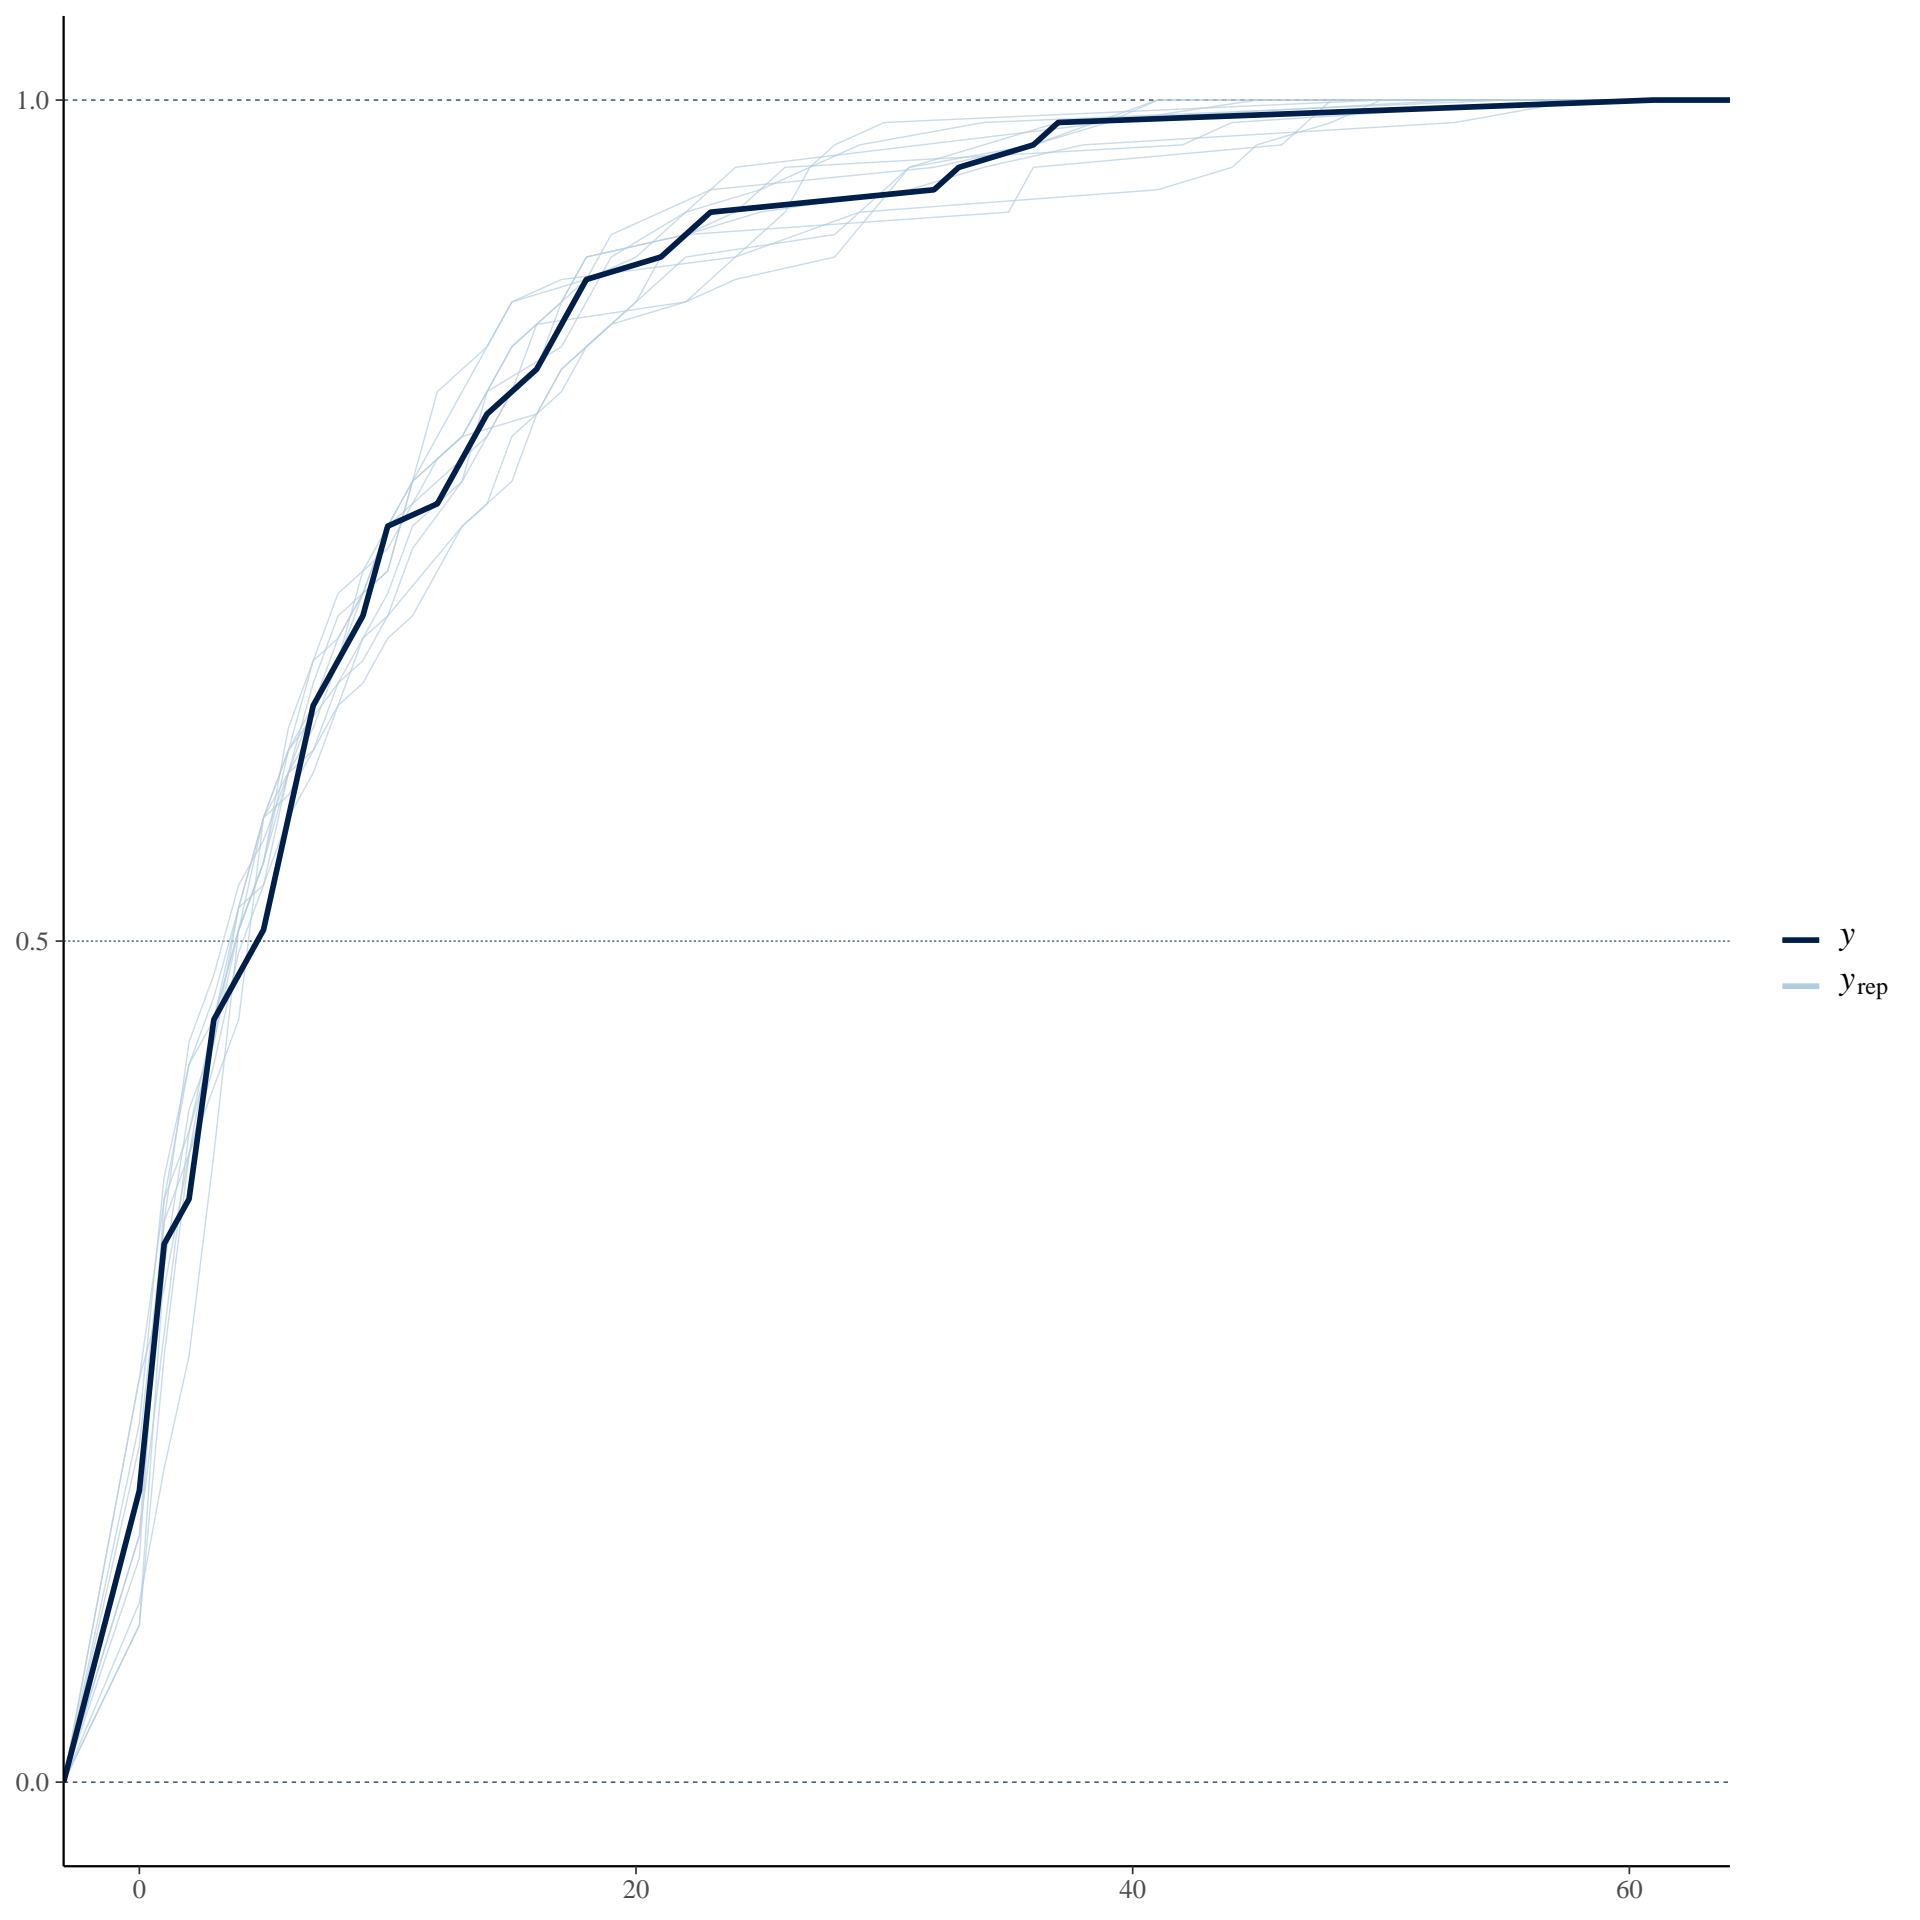

Supplement: 41380_2023_2062_MOESM4_ESM.pdf [file 41380_2023_2062_MOESM4_ESM.pdf]
