# Supplementary material
Source: PubMed Central journal article supplement (PMC10615744)

**A**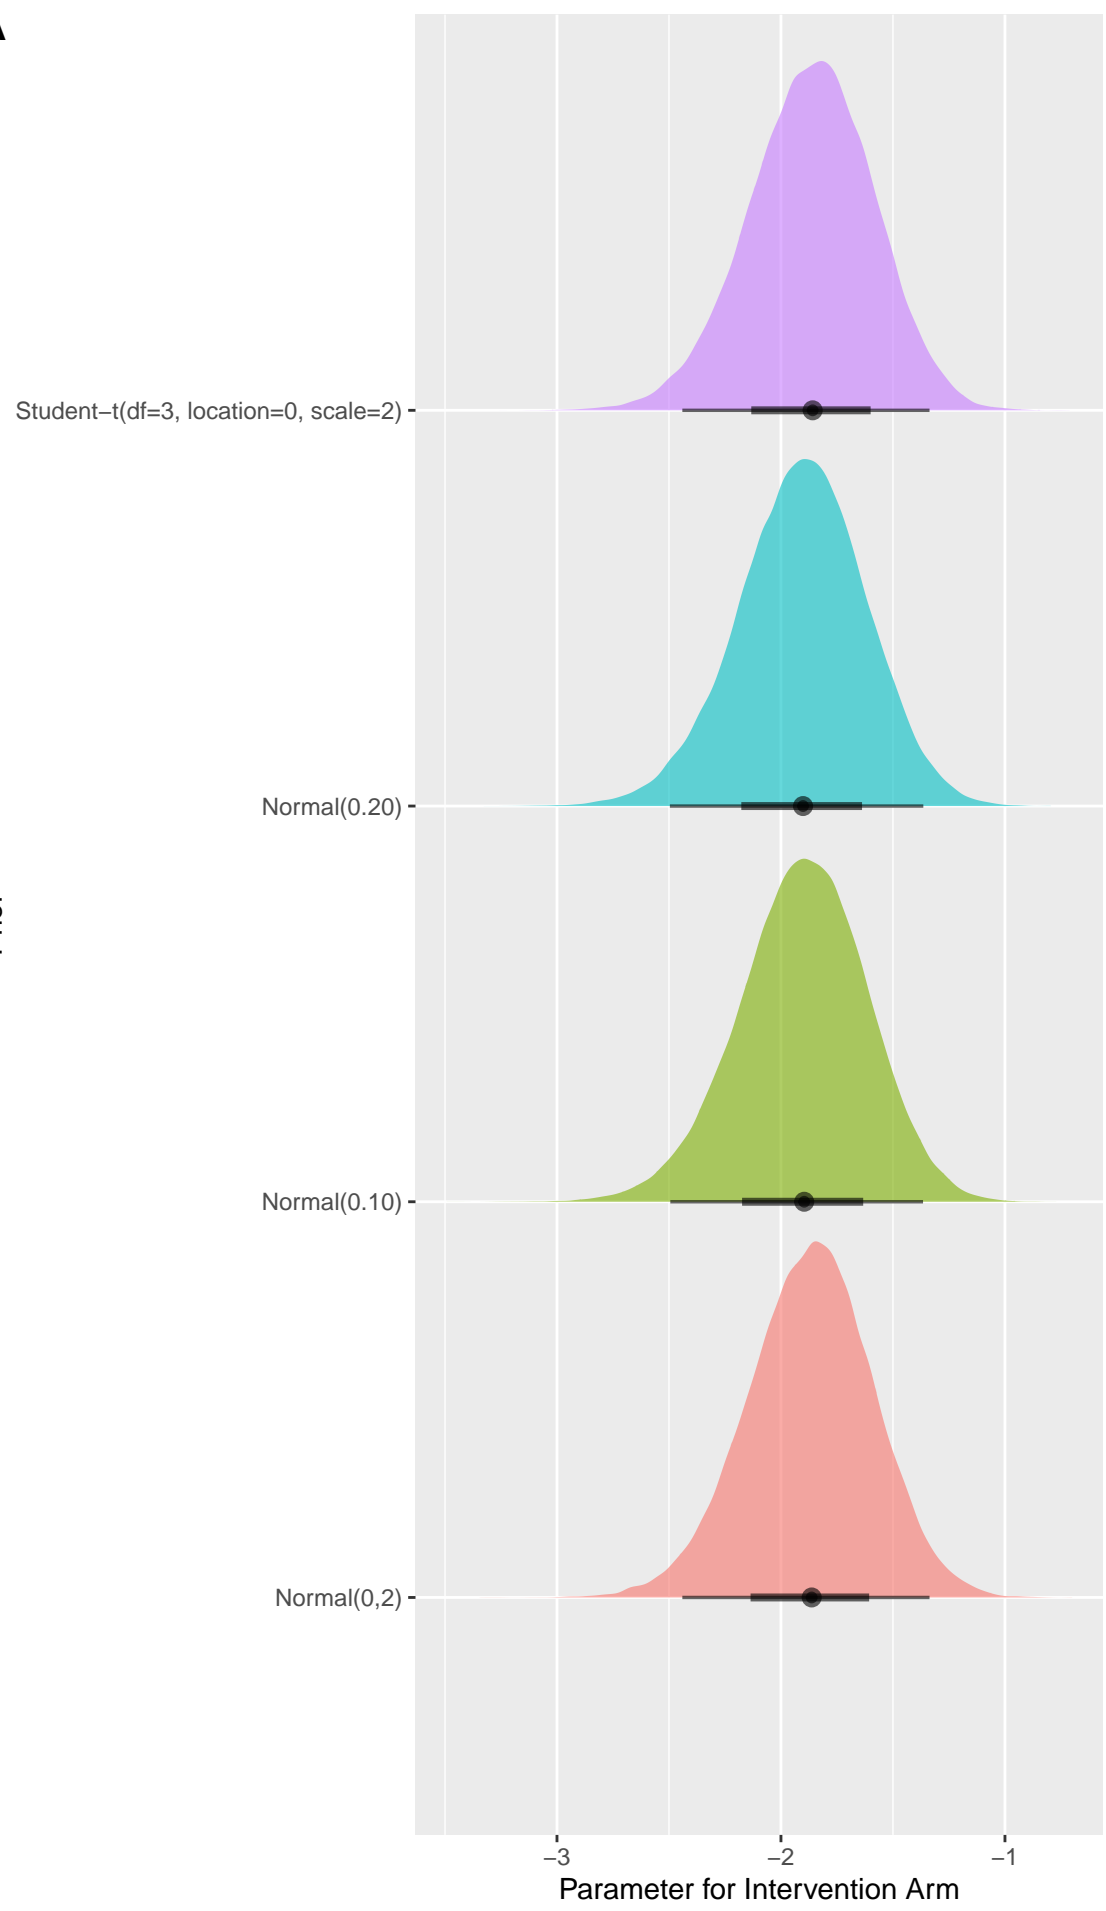**B**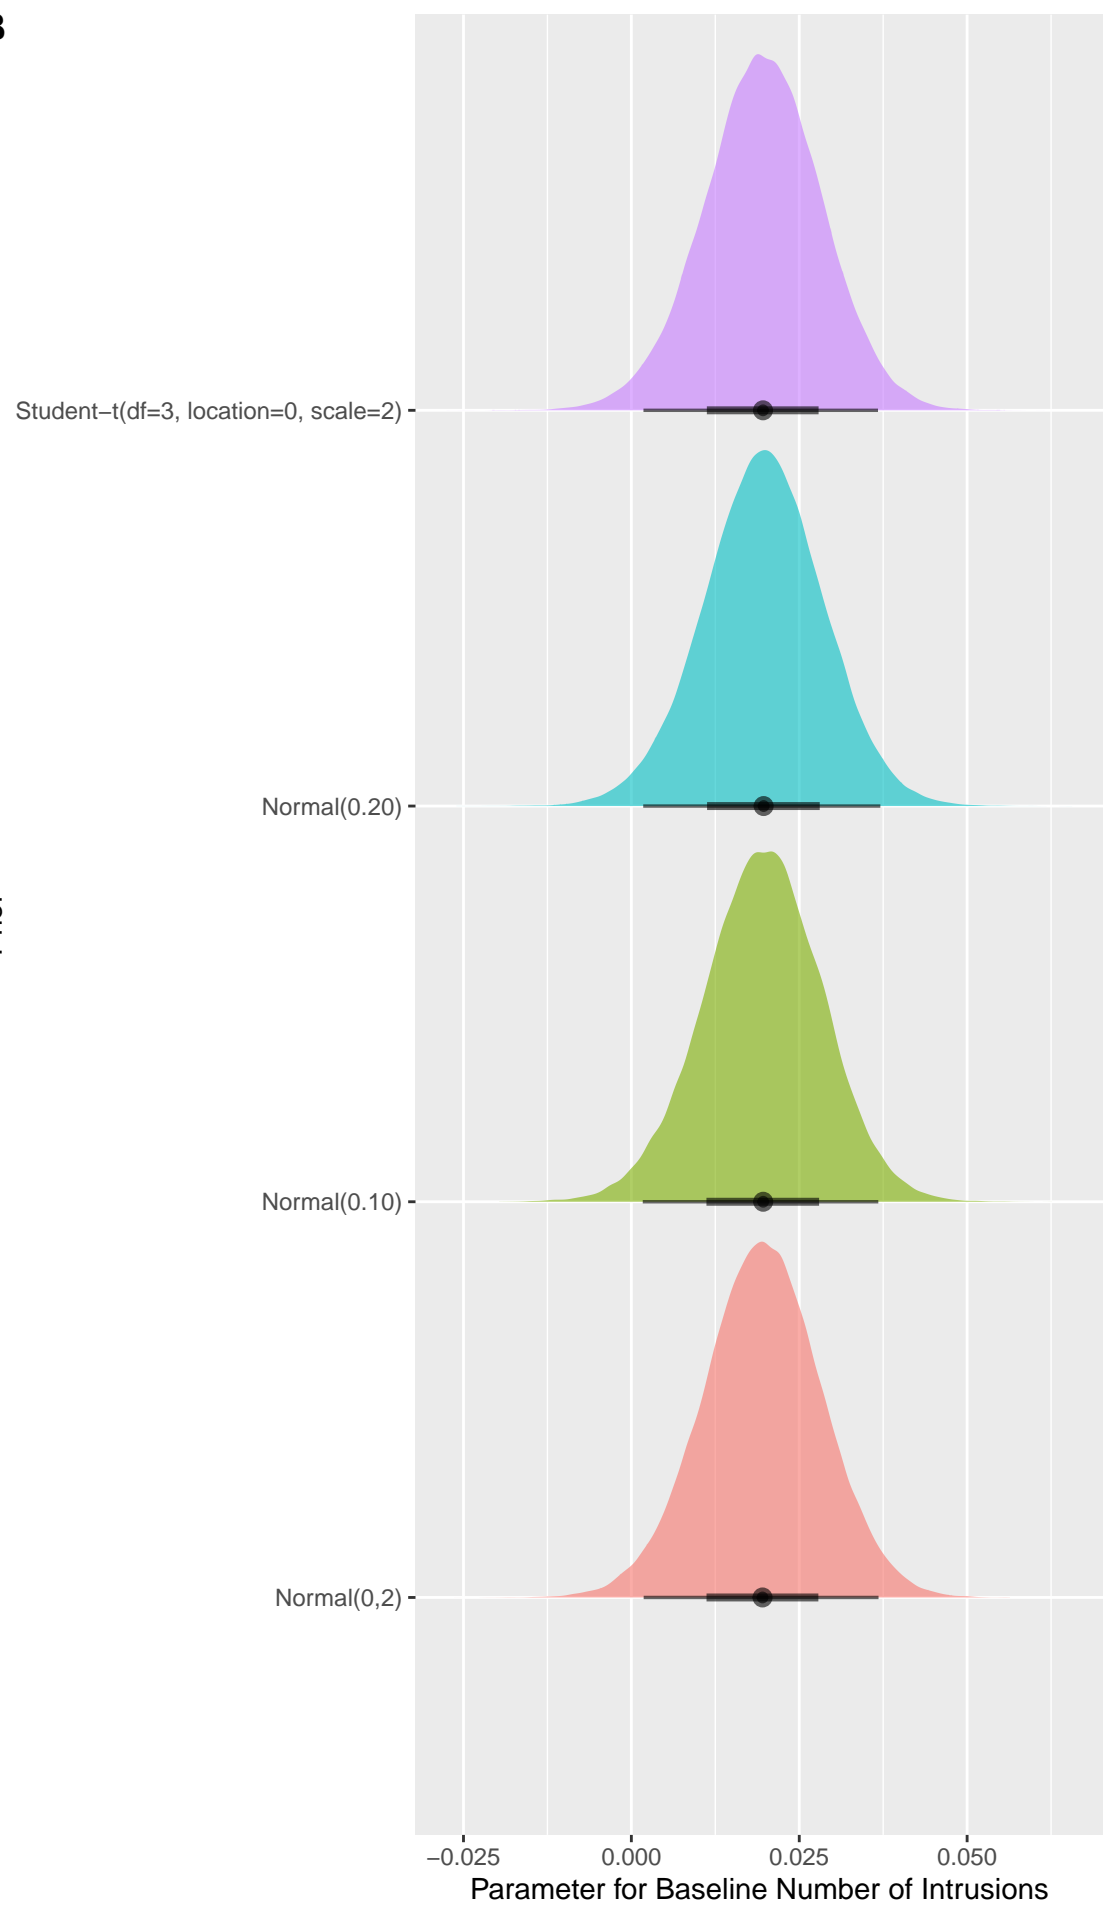

Supplement: 41380_2023_2062_MOESM5_ESM.pdf [file 41380_2023_2062_MOESM5_ESM.pdf]
