# Supplementary material
Source: PubMed Central journal article supplement (PMC10615744)
Supplement: 41380_2023_2062_MOESM7_ESM.pdf [file 41380_2023_2062_MOESM7_ESM.pdf]

**A**

Data Without Outliers

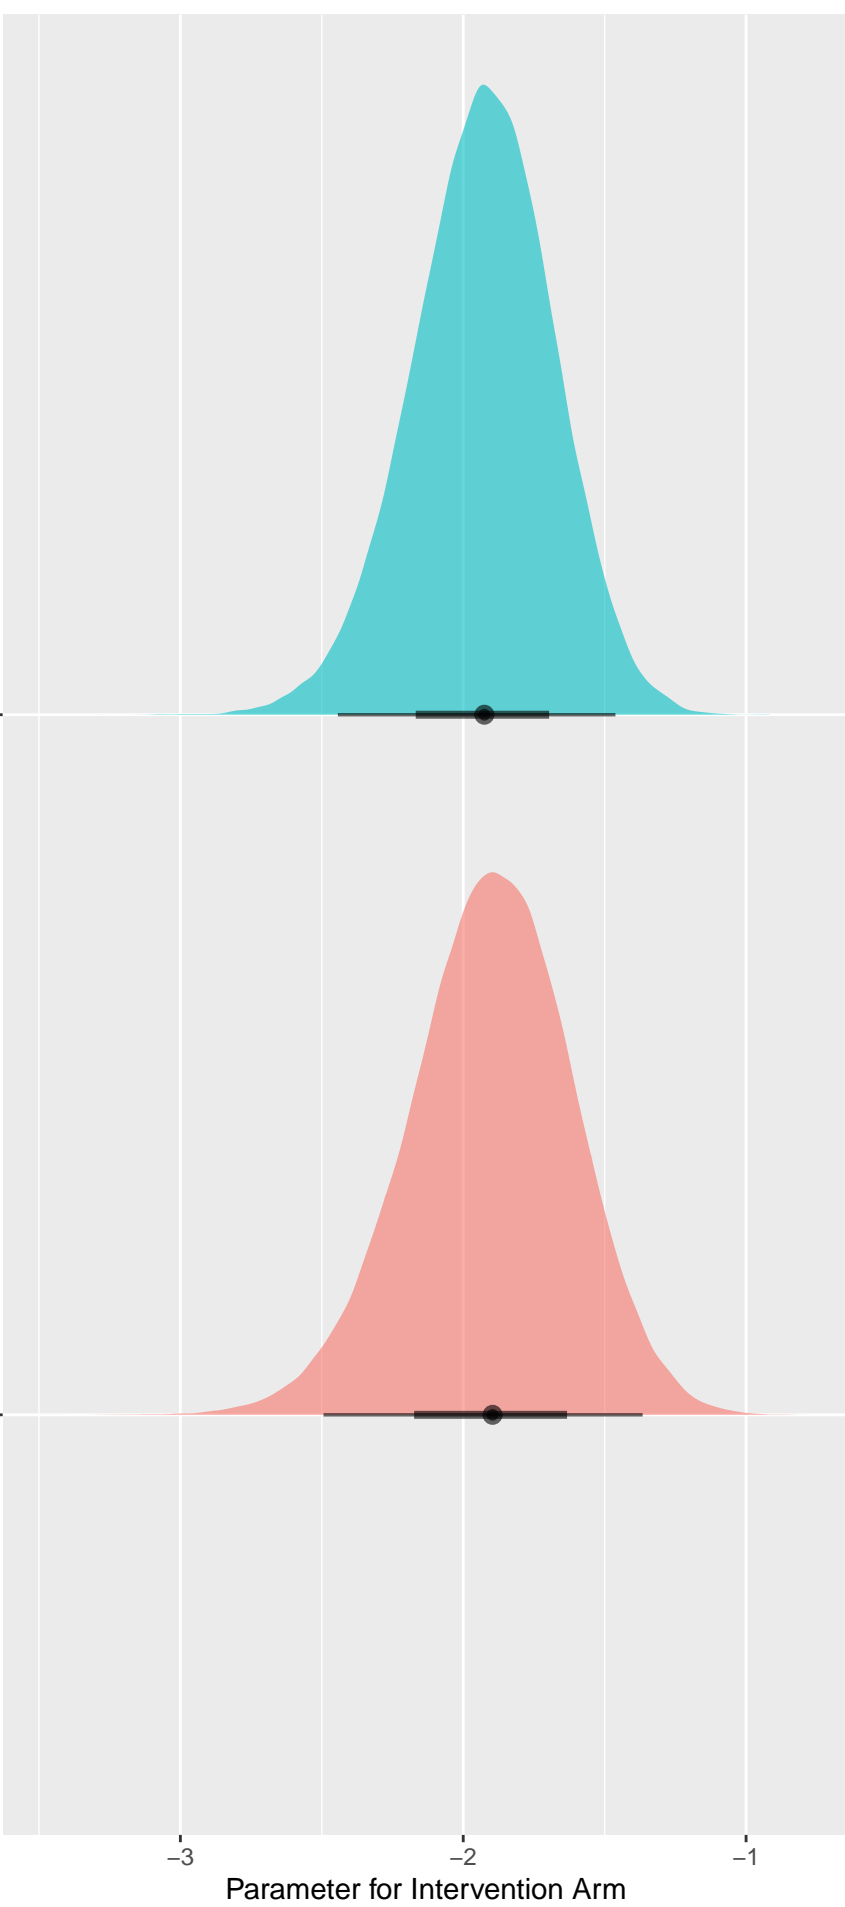

Data

All Data

Parameter for Intervention Arm

**B**

Data Without Outliers

Data

All Data

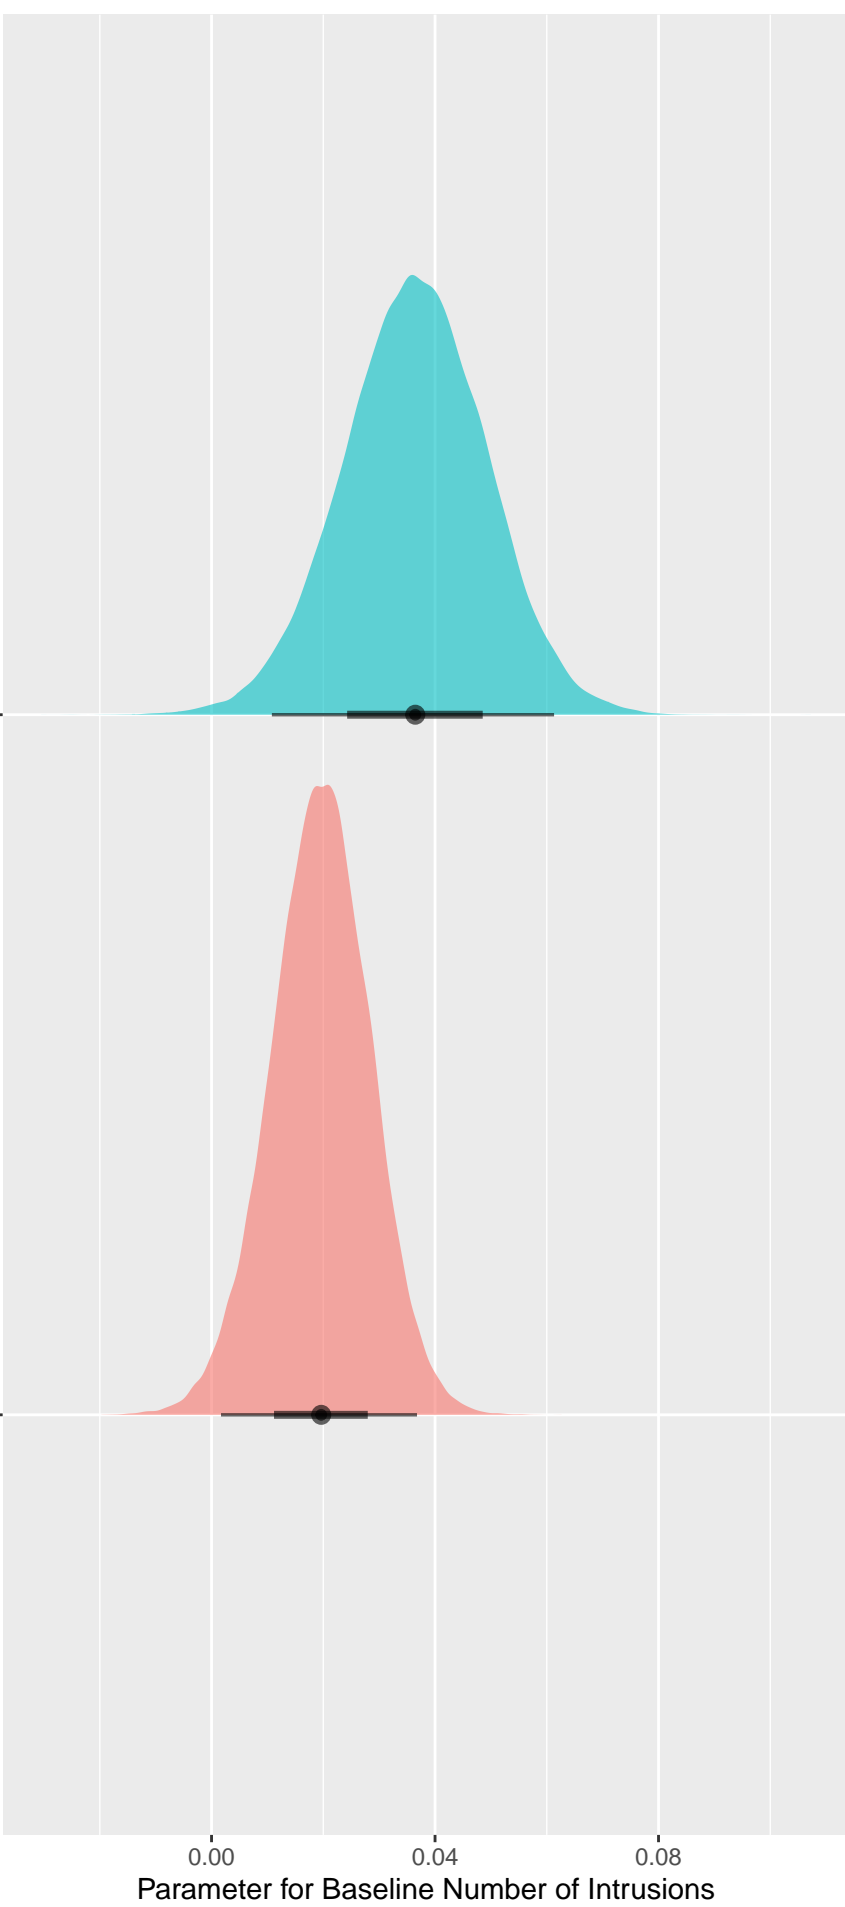

Parameter for Baseline Number of Intrusions
