# Supplementary material
Source: PubMed Central journal article supplement (PMC10615744)

Bayes Factor vs Sample Size: Testing for Superiority of immediate arm vs delayed arm

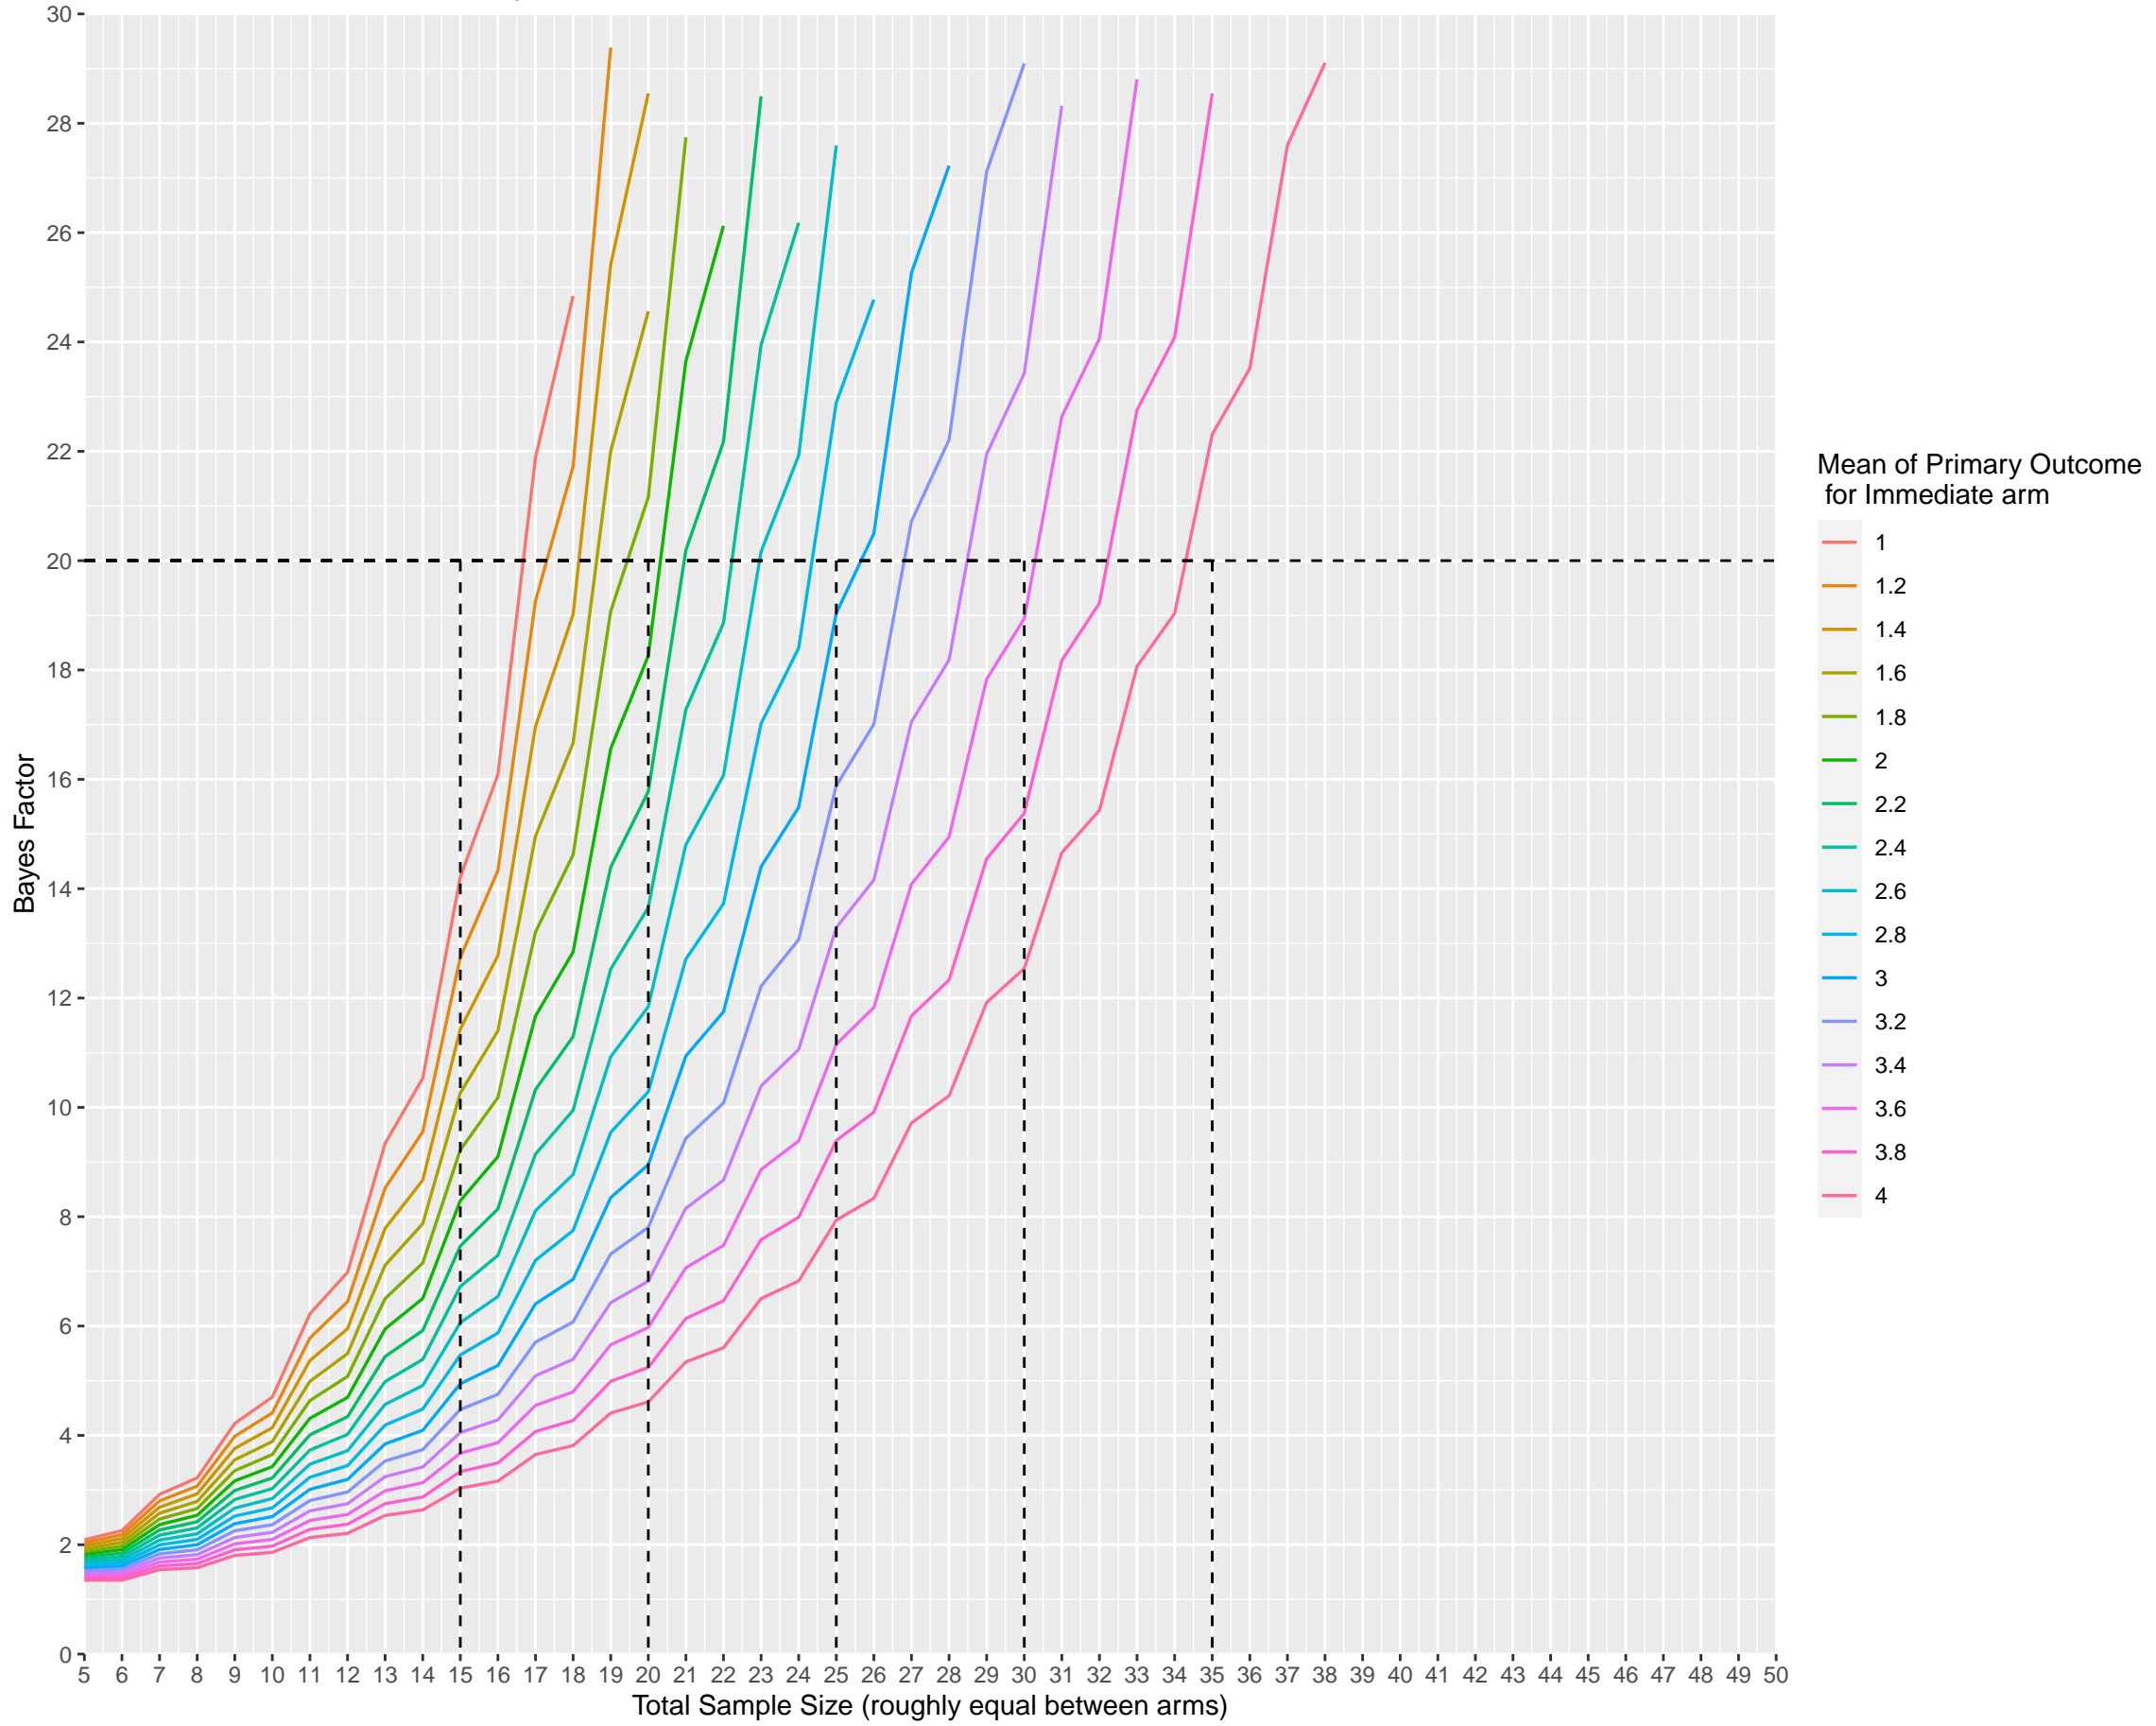

Supplement: 41380_2023_2062_MOESM9_ESM.pdf [file 41380_2023_2062_MOESM9_ESM.pdf]
