# Supplementary material
Source: PubMed Central journal article supplement (PMC10615744)

**A** Bayes Factor vs Sample Size: Testing for Equivalence of optimised intervention compared to former intervention

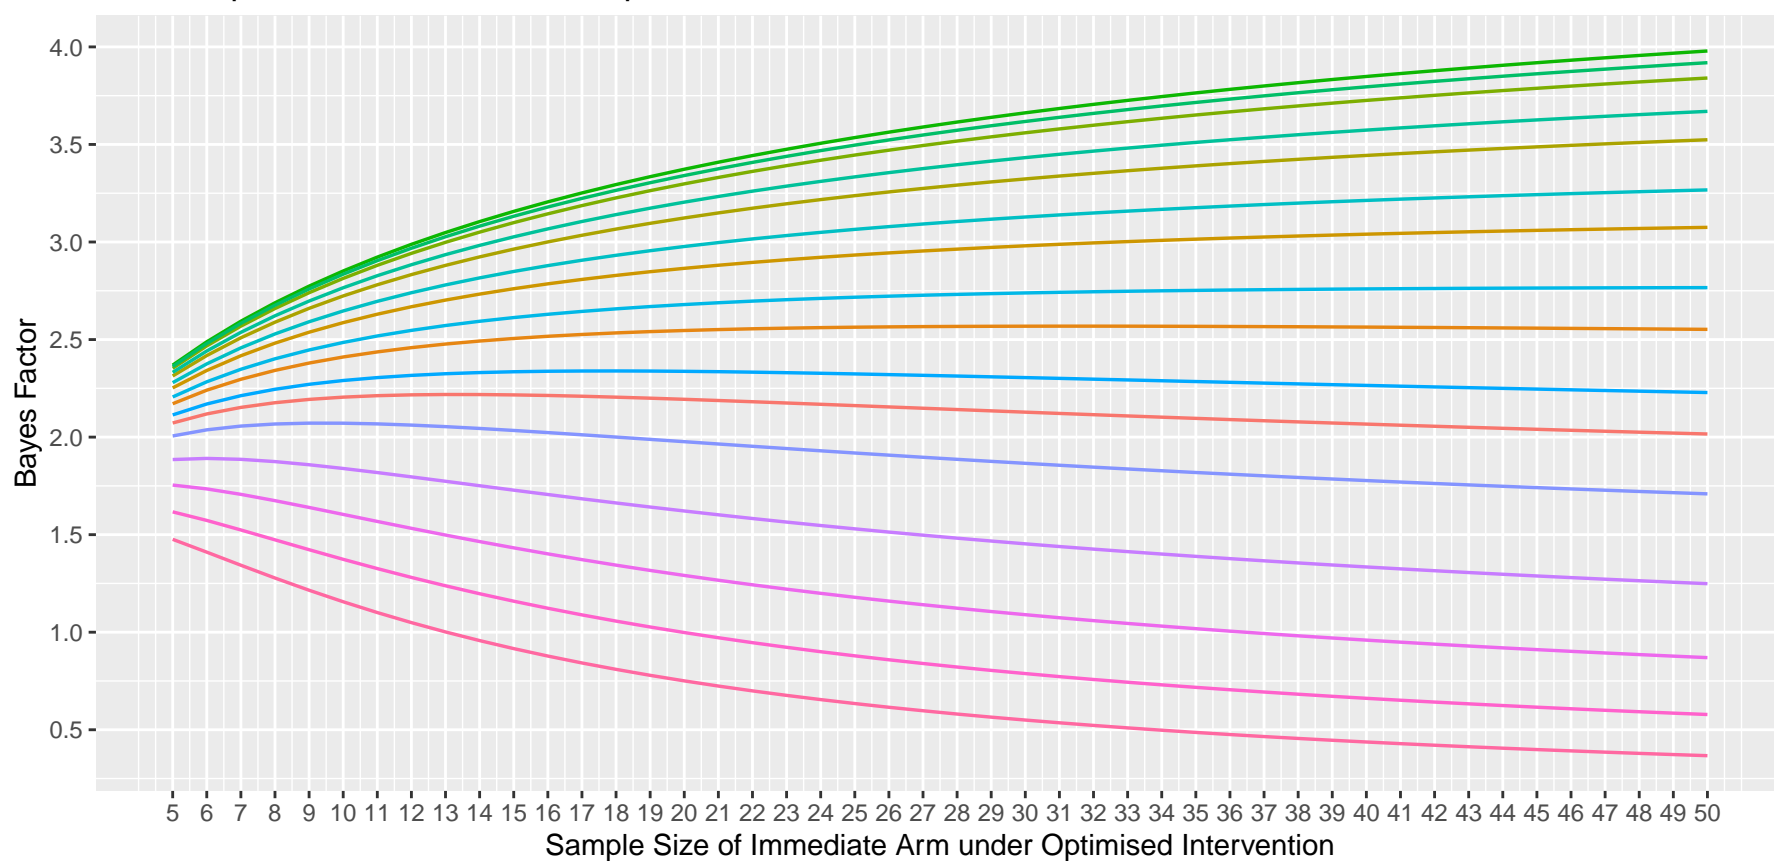

**B** Bayes Factor vs Sample Size: Testing for Non-Inferiority of optimised intervention compared to former intervention

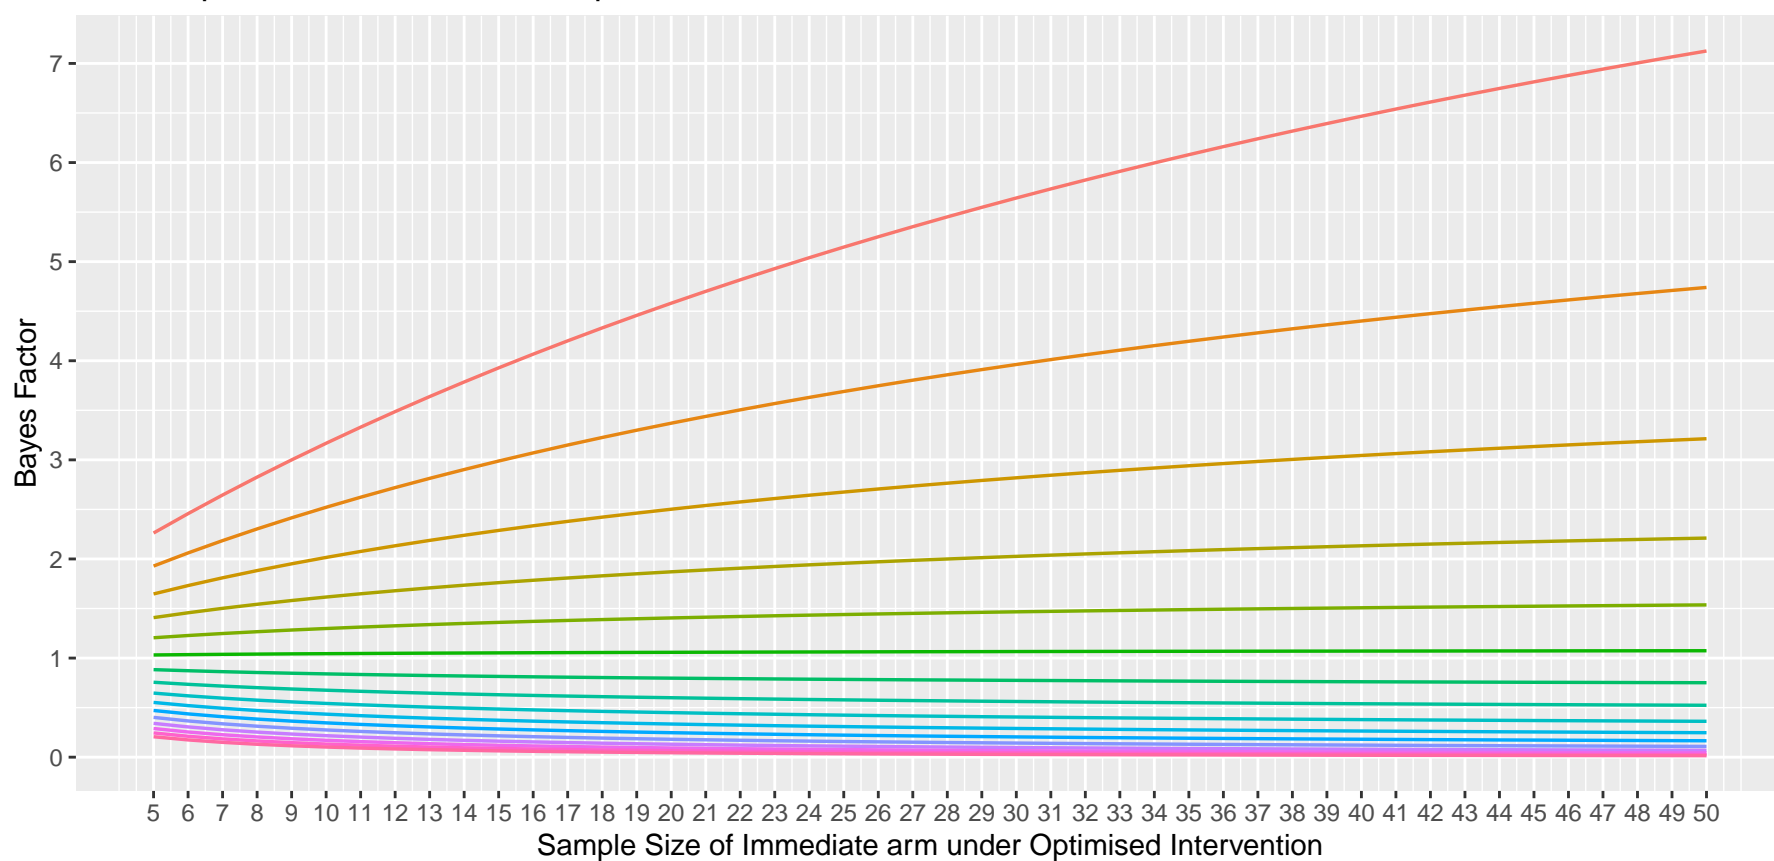

Supplement: 41380_2023_2062_MOESM10_ESM.pdf [file 41380_2023_2062_MOESM10_ESM.pdf]
